# Supplementary material for: Evaluation of Spinning Cone Column Distillation as a Strategy for Remediation of Smoke Taint in Juice and Wine
Source: MDPI journal article supplement (doi:10.3390/molecules27228096), 2022-11-21
Supplement: s1 [file s1]

# Evaluation of Spinning Cone Column Distillation as a Strategy for Remediation of Smoke Taint in Juice and Wine

Carolyn Puglisi <sup>1</sup>, Renata Ristic <sup>1</sup>, Jamie Saint <sup>2</sup> and Kerry Wilkinson <sup>1,\*</sup>

<sup>1</sup> Department of Wine Science, Waite Research Institute, The University of Adelaide, PMB 1, Glen Osmond, SA 5064, Australia

<sup>2</sup> Australian Vintage Limited, 2 Queens Place, Balmain, NSW 2041, Australia

\* Correspondence: kerry.wilkinson@adelaide.edu.au (K.W.); Tel: +61-8-8313-7360

**Table S1.** Chemical structures and physical properties of smoke-derived volatile phenols.

|                                | <b>Guaiacol</b>                                                                   | <b>4-Methyl<br/>Guaiacol</b>                                                       | <i>o</i> -Cresol                                                                    | <i>m</i> -Cresol                                                                    | <i>p</i> -Cresol                                                                    | <b>Syringol</b>                                                                     | <b>4-Methyl<br/>Syringol</b>                                                        |
|--------------------------------|-----------------------------------------------------------------------------------|------------------------------------------------------------------------------------|-------------------------------------------------------------------------------------|-------------------------------------------------------------------------------------|-------------------------------------------------------------------------------------|-------------------------------------------------------------------------------------|-------------------------------------------------------------------------------------|
| Structure                      | 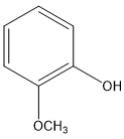 |  |  |  |  |  |  |
| Molecular weight (amu)         | 124.14                                                                            | 186.25                                                                             | 108.14                                                                              | 108.14                                                                              | 108.14                                                                              | 154.17                                                                              | 168.19                                                                              |
| Boiling point (°C)             | 205                                                                               | 221                                                                                | 191                                                                                 | 202                                                                                 | 202                                                                                 | 260                                                                                 | 268                                                                                 |
| Vapor pressure (mm Hg at 25°C) | 0.179                                                                             | 0.078                                                                              | 0.030 <sup>1</sup>                                                                  | 0.110                                                                               | 0.110                                                                               | 0.006                                                                               | 0.005                                                                               |

Values sourced from The Good Scents Company ([www.thegoodscentscompany.com](http://www.thegoodscentscompany.com), accessed on 28th August 2022), except for the vapor pressure for 4-methylsyringol, which was sourced from ChemBK ([www.chembk.com/en](http://www.chembk.com/en), accessed on 28th August 2022). <sup>1</sup> Vapor pressure (mm Hg at 20 °C).

**Table S2.** Mean intensity ratings for sensory attributes of smoke-tainted Shiraz Sangiovese and Petit Verdot Sangiovese wines, before and after spinning cone column distillation.

|                     | Shiraz Sangiovese |          |           |           | P       | Petit Verdot Sangiovese |          |           |           | P       |
|---------------------|-------------------|----------|-----------|-----------|---------|-------------------------|----------|-----------|-----------|---------|
|                     | Control           | 1% strip | 13% strip | 29% strip |         | Control                 | 1% strip | 14% strip | 29% strip |         |
| fruit aroma         | 4.04 a            | 3.64 ab  | 3.38 b    | 2.82 c    | <0.0001 | 3.94 a                  | 3.30 b   | 3.12 b    | 2.64 c    | <0.0001 |
| smoke aroma         | 2.20 b            | 2.64 b   | 3.42 a    | 3.88 a    | <0.0001 | 2.14 c                  | 2.78 bc  | 3.32 ab   | 3.78 a    | <0.0001 |
| cold ash aroma      | 1.94 c            | 2.48 bc  | 3.12 ab   | 3.34 a    | <0.0001 | 1.88 b                  | 2.42 b   | 3.32 a    | 3.30 a    | <0.0001 |
| earthy aroma        | 2.48              | 2.24     | 2.64      | 3.04      | ns      | 2.06 c                  | 2.50 bc  | 2.64 ab   | 3.12 a    | 0.002   |
| medicinal aroma     | 1.80              | 1.88     | 1.80      | 2.48      | ns      | 2.44                    | 2.20     | 2.00      | 2.38      | ns      |
| burnt rubber aroma  | 0.88 c            | 1.20 c   | 2.00 b    | 2.68 a    | <0.0001 | 1.28 b                  | 1.66 b   | 2.36 a    | 2.76 a    | <0.0001 |
| reduced aroma       | 0.78 c            | 1.22 bc  | 1.50 b    | 2.64 a    | <0.0001 | 1.20 b                  | 1.30 b   | 2.02 a    | 2.52 a    | <0.0001 |
| oxidized aroma      | 1.14 b            | 1.22 b   | 1.54 b    | 2.52 a    | <0.0001 | 1.70                    | 1.34     | 1.52      | 1.88      | ns      |
| fruit flavor        | 3.78 a            | 3.54 ab  | 2.92 cd   | 2.24 e    | <0.0001 | 3.62 a                  | 3.26 b   | 2.76 c    | 2.04 d    | <0.0001 |
| smoky flavor        | 2.52 cd           | 2.58 cd  | 3.30 ab   | 3.30 ab   | 0.012   | 2.06 d                  | 2.76 bc  | 3.08 abc  | 3.36 a    | <0.0001 |
| medicinal flavor    | 1.86 b            | 1.82 b   | 2.24 ab   | 2.76 a    | 0.017   | 2.54 a                  | 2.46 ab  | 2.58 a    | 2.44 abc  | ns      |
| burnt rubber flavor | 1.08 b            | 1.26 b   | 1.82 a    | 2.10 a    | 0.001   | 1.24 c                  | 1.34 bc  | 1.80 ab   | 1.92 a    | 0.015   |
| reduced flavor      | 0.84 c            | 1.10 bc  | 1.40 ab   | 1.88 a    | 0.0001  | 1.02 c                  | 1.06 bc  | 1.60 ab   | 1.94 a    | 0.003   |
| oxidized flavor     | 1.20 b            | 1.18 b   | 1.64 b    | 2.96 a    | <0.0001 | 1.64 c                  | 1.66 c   | 2.30 b    | 2.90 a    | <0.0001 |
| ashy aftertaste     | 2.48 cd           | 2.92 bc  | 3.16 b    | 3.26 ab   | <0.0001 | 2.08 c                  | 2.78 b   | 3.26 ab   | 3.80 a    | <0.0001 |
| woody aftertaste    | 2.58              | 2.48     | 3.02      | 2.68      | ns      | 2.44                    | 2.60     | 2.62      | 2.56      | ns      |
| metallic            | 1.52 b            | 1.54 b   | 1.94 ab   | 2.30 a    | 0.015   | 1.80                    | 1.68     | 2.16      | 2.16      | ns      |
| acidity             | 3.96 c            | 3.68 c   | 4.48 b    | 5.90 a    | <0.0001 | 3.62 c                  | 3.70 c   | 4.84 b    | 5.78 a    | <0.0001 |
| bitterness          | 3.44              | 3.54     | 3.08      | 3.10      | ns      | 3.60 a                  | 3.48 ab  | 2.96 c    | 3.02 bc   | 0.014   |
| saltiness           | 2.04 c            | 2.22 c   | 2.96 b    | 3.80 a    | <0.0001 | 2.14 c                  | 2.48 c   | 2.98 b    | 3.90 a    | <0.0001 |
| hotness             | 3.78 a            | 3.52 a   | 2.44 b    | 2.42 b    | <0.0001 | 3.62 a                  | 3.58 a   | 2.40 b    | 2.38 b    | <0.0001 |
| drying              | 3.90              | 3.68     | 3.82      | 3.68      | ns      | 3.54 ab                 | 3.62 a   | 3.12 b    | 3.16 b    | 0.018   |
| astringency         | 3.88              | 3.70     | 3.74      | 3.40      | ns      | 3.54 a                  | 3.62 a   | 3.02 b    | 3.26 ab   | 0.020   |

Values are means of ratings from 50 panelists. Different letters within rows indicate statistical significance ( $P \leq 0.05$ , two-way ANOVA); ns = not significant.

**Table S3.** Median normalized peak heights of fermentation volatiles ( $\mu\text{g/L}$ ) detected in condensate derived from spinning cone column distillation of smoke-tainted Shiraz Sangiovese and Petit Verdot Sangiovese wines.

| Volatile               | Descriptors <sup>1</sup>  | Boiling Point ( $^{\circ}\text{C}$ ) <sup>2</sup> | Shiraz Sangiovese |           |           | Petit Verdot Sangiovese |           |           | Match Factor |
|------------------------|---------------------------|---------------------------------------------------|-------------------|-----------|-----------|-------------------------|-----------|-----------|--------------|
|                        |                           |                                                   | 1% strip          | 14% strip | 28% strip | 1% strip                | 14% strip | 28% strip |              |
| ethyl acetate          | nail polish               | 77                                                | 6005 <sup>3</sup> | 9841      | 8623      | 7793 <sup>3</sup>       | 7734      | 6764      | 90%          |
| ethyl propanoate       | fruity                    | 99                                                | 119               | 97        | 86        | 169                     | 101       | 84        | 91%          |
| ethyl butanoate        | fruity, strawberry        | 121                                               | 389               | 327       | 246       | 391                     | 262       | 197       | 93%          |
| ethyl hexanoate        | green apple, fruity       | 168                                               | 6005 <sup>3</sup> | 7293      | 5681      | 7793 <sup>3</sup>       | 6644      | 4925      | 99%          |
| ethyl octanoate        | melon, soap               | 208                                               | 6005 <sup>3</sup> | 7178      | 6574      | 7793 <sup>3</sup>       | 7777      | 5735      | 99%          |
| ethyl decanoate        | floral, soap              | 245                                               | 4301              | 1618      | 1515      | 7104                    | 1646      | 1074      | 99%          |
| 2-methylpropyl acetate | banana                    | 118                                               | 28                | 67        | 84        | 29                      | 57        | 75        | 59%          |
| 2-methylbutyl acetate  | banana                    | 140                                               | 662               | 484       | 320       | 833                     | 516       | 365       | 83%          |
| 3-methylbutyl acetate  | banana                    | 142                                               | 3108              | 3072      | 2115      | 4293                    | 3554      | 2709      | 90%          |
| hexyl acetate          | lolly                     | 172                                               | 883               | 293       | 175       | 1317                    | 335       | 180       | 90%          |
| 1-propanol             | alcohol, pungent          | 97                                                | 36                | 103       | 114       | 50                      | 99        | 116       | 86%          |
| 2-methylpropanol       | wine, solvent, bitter     | 108                                               | 274               | 607       | 570       | 325                     | 513       | 461       | 86%          |
| 2-methylbutanol        | solvent                   | 129                                               | 806               | 2321      | 2207      | 1325                    | 2571      | 2593      | 90%          |
| 3-methylbutanol        | harsh, nail polish, fusel | 131                                               | 1591              | 4453      | 4597      | 2423                    | 4396      | 5034      | 90%          |
| hexanol                | green, grass              | 157                                               | 211               | 497       | 353       | 201                     | 353       | 250       | 90%          |

<sup>1</sup> Descriptors sourced from Wang et al. 2018 [56], Smyth 2005 [57], and publications cited therein. <sup>2</sup> Values sourced from The Good Scents Company ([www.thegoodscentscompany.com](http://www.thegoodscentscompany.com), accessed on 28th August 2022). <sup>3</sup> Values at/near saturation point appeared as constant numbers.

**Table S4.** Aroma and palate attributes evaluated during sensory analysis.

| Attributes          | Definition                                                                                                                                         |
|---------------------|----------------------------------------------------------------------------------------------------------------------------------------------------|
| fruit aroma         | Intensity of the overall fruit aroma                                                                                                               |
| smoke aroma         | Perception of any type of smoke aroma, including smoked meat/bacon, toasty, charry, cigar-box, estery                                              |
| cold ash aroma      | Burnt aroma associate with ashes, including ashtray, tarry, campfire                                                                               |
| earthy aroma        | Any aroma associated with musty, dusty, wet-wood, barnyard, mushroom-like, dank, moldy, stagnant, stale                                            |
| medicinal aroma     | Aromatic characteristic of Band-Aids, disinfectant-like, including cleaning products, solvents, chemicals                                          |
| burnt rubber aroma  | Perception of burnt rubber-like aromas                                                                                                             |
| reduced aroma       | Perception of stinky, rubber, sulfur, garlic aromas                                                                                                |
| oxidized aroma      | Perception of vinegar or bruised apple aroma                                                                                                       |
| fruit flavor        | Intensity of the overall fruit flavor                                                                                                              |
| smoky flavor        | Perception of smoke flavor, including bacon and smoked meat                                                                                        |
| medicinal flavor    | Perception of medicinal flavors, including disinfectant-like, cleaning products and solvents                                                       |
| burnt rubber flavor | Perception of burnt rubber flavor                                                                                                                  |
| reduced flavor      | Perception of stinky, rubber, sulfur, garlic flavor                                                                                                |
| oxidized flavor     | Perception of vinegar or bruised apple flavor                                                                                                      |
| ashy aftertaste     | Length of taste associated with residue of ashtray perceived in the mouth after expectorating, including coal ash, ashtray, tarry, acrid, campfire |
| woody aftertaste    | Length of taste associated with woody residue, includes wood, oak, pencil shavings                                                                 |
| metallic            | The 'tinny' flavor associated with metals                                                                                                          |
| acidity             | Intensity of sour/acid taste                                                                                                                       |
| bitterness          | Intensity of bitter taste or aftertaste                                                                                                            |
| saltiness           | Intensity of salty taste                                                                                                                           |
| hotness             | Intensity of warmth/heat due to ethanol                                                                                                            |
| drying              | Intensity of drying sensation in the mouth                                                                                                         |
| astringency         | Intensity of rough, puckering mouthfeel                                                                                                            |

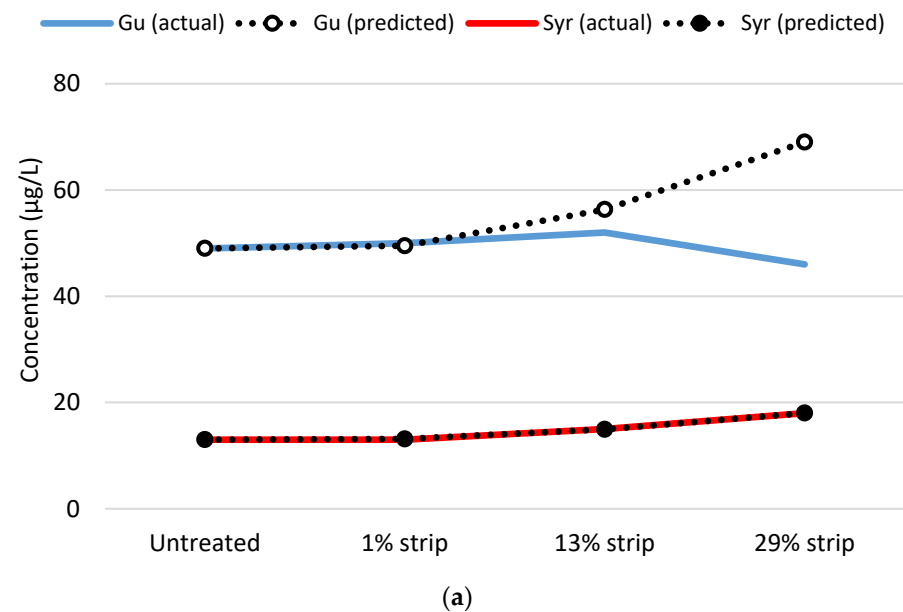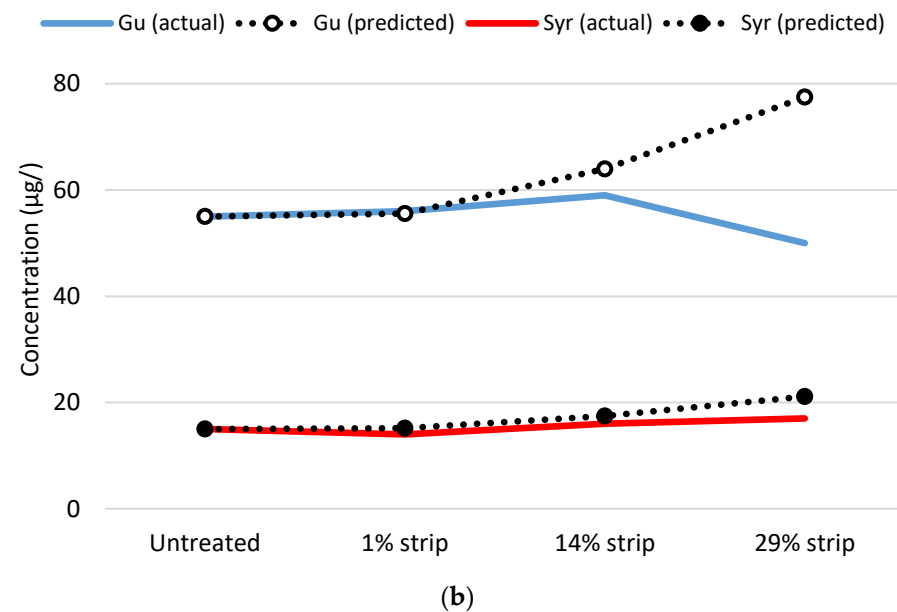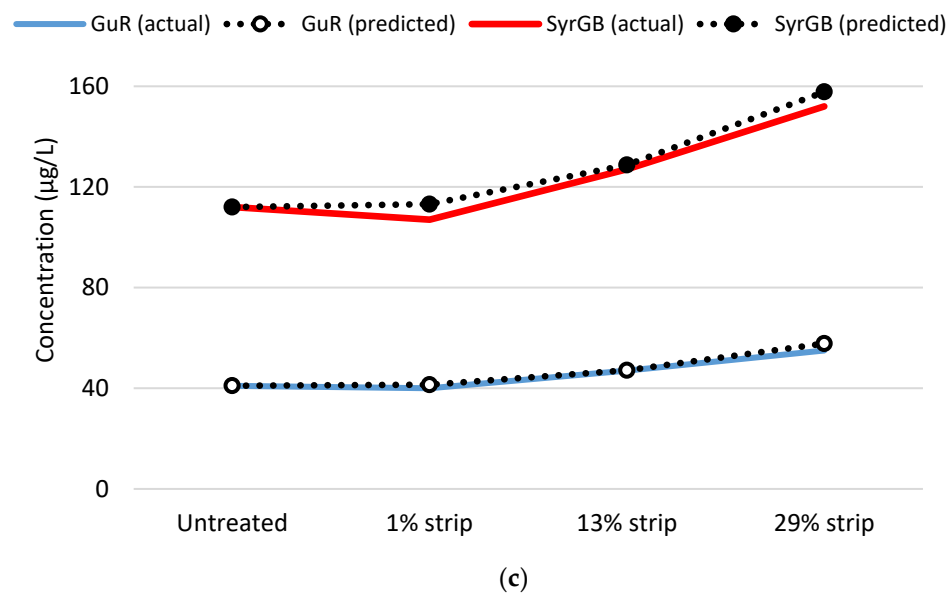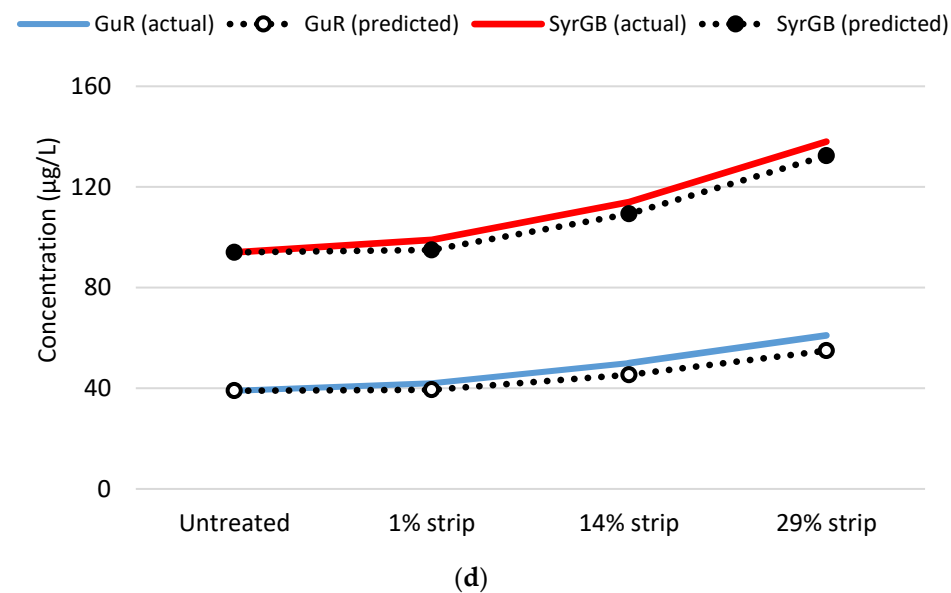

**Figure S1.** Predicted and actual concentrations of (a,b) guaiacol (Gu) and syringol (Syr), and (c,d) their glycoconjugates (GuR and SyrGB), in smoke-tainted (a,c) Shiraz Sangiovese and (c,d) Petit Verdot Sangiovese wines, before and after SCC distillation. Predicted concentrations were calculated by adjusting initial (untreated) concentrations based on 1%, 13–14% and 29% stripping rates (i.e., accounting for concentration due to removal of 1%, 13–14% and 29% of the initial wine volume).
